# Supplementary material
Source: PubMed Central journal article supplement (PMC7442217)
Supplement: NIHMS1615846-supplement-Electronic_Supplemental_Information.pdf [file NIHMS1615846-supplement-Electronic_Supplemental_Information.pdf]

# Supplementary information for: Oxygen-Purged Microfluidic Device to Enhance Cell Viability in Photopolymerized PEG Hydrogel Microparticles

*Bingzhao Xia, Kaspars Krutkramelis, John Oakey\**

Department of Chemical Engineering, University of Wyoming, Laramie, WY 82071, USA

\*Corresponding author, E-mail: joakey@uwyo.edu

**Table 1.** PEGDA polymerization reaction steps

| Steps # | Reaction                                  | Description          |
|---------|-------------------------------------------|----------------------|
| 1       | $I \xrightarrow{k_d} R^*$                 | Initiator photolysis |
| 2       | $R^* + M \xrightarrow{k_i} M^*$           | Monomer activation   |
| 3       | $M_n^* + M \xrightarrow{k_p} M_{n+1}^*$   | Chain propagation    |
| 4       | $M_n^* + M_m^* \xrightarrow{k_t} M_{n+m}$ | Chain termination    |
| 5       | $M_n^* + O_2 \xrightarrow{k_{O_2}} MOO$   | Oxygen inhibition    |
| 6       | $M_n^* + O_2 \xrightarrow{k_{O_2}} MOO$   | Radical oxidation    |

In the above table, M represents unconverted double bonds; M\* represents the radical species; X represents all the radical species (M\* and R\*).

**Table 2.** Parameters involved in modeling predicted peroxy radical accumulation

| Parameter                  | Description                               | Value                                                                | Reference    |
|----------------------------|-------------------------------------------|----------------------------------------------------------------------|--------------|
| r                          | radius of the droplets                    | 25 $\mu\text{m}$                                                     | <sup>1</sup> |
| D <sub>O<sub>2</sub></sub> | oxygen diffusivity in the droplet         | 1*10 <sup>-10</sup> m <sup>2</sup> /s                                | <sup>2</sup> |
| D <sub>I</sub>             | Photoinitiator diffusivity in the droplet | 1*10 <sup>-18</sup> m <sup>2</sup> /s                                | <sup>3</sup> |
| k <sub>O<sub>2</sub></sub> | Rate constant of the radical              | 5*10 <sup>5</sup> m <sup>3</sup> *mol <sup>-1</sup> *s <sup>-1</sup> | <sup>4</sup> |

|                     |                                      |                                                                            |              |
|---------------------|--------------------------------------|----------------------------------------------------------------------------|--------------|
|                     | oxidation                            |                                                                            |              |
| $k_p$               | Rate constant of polymer propagation | $25 \text{ m}^3 \cdot \text{mol}^{-1} \cdot \text{s}^{-1}$                 | <sup>1</sup> |
| $k_t$               | Rate constant of radical termination | $2.5 \cdot 10^3 \text{ m}^3 \cdot \text{mol}^{-1} \cdot \text{s}^{-1}$     | <sup>1</sup> |
| $\phi$              | Quantum yield of radical             | 1.0                                                                        | <sup>5</sup> |
| $\lambda$           | Wavelength                           | 365 nm                                                                     |              |
| $N_A$               | Avogadro number                      | $\text{mol}^{-1}$                                                          |              |
| $h$                 | Planck's constant                    | $6.63 \cdot 10^{-34} \text{ m}^2 \cdot \text{kg}^{-1} \cdot \text{s}^{-1}$ |              |
| $C$                 | Speed of light                       | $2.99 \cdot 10^8 \text{ m} \cdot \text{s}^{-1}$                            |              |
| $\epsilon$          | Molar absorptivity                   | $2.18 \cdot 10^5 \text{ cm}^2 \cdot \text{mol}^{-1}$                       | <sup>5</sup> |
| $I_0$               | UV light intensity                   | $220 \text{ mW} \cdot \text{cm}^{-2}$                                      |              |
| $MW_{\text{PEGDA}}$ | Molecular weight of PEGDA            | $3.4 \cdot 10^3 \text{ g} \cdot \text{mol}^{-1}$                           |              |

## References

- (1) Decker, C.; Jenkins, A. D. *Macromolecules* 1985, 18 (6), 1241–1244.
- (2) O'Brien, A. K.; Bowman, C. N. *Macromol. Theory Simul.* 2006, 15 (2), 176–182.
- (3) Long, K. N.; Scott, T. F.; Qi, H. J.; Bowman, C. N. *J. Mech. Phys. Solids* 2009, 57(7), 1103-1121.
- (4) Maillard, B.; Ingold, K. U.; Scaiano, J. C. *J. Am. Chem. Soc.* 1983, 105(15):5095-9.
- (5) Fairbanks, B. D.; Schwartz, M. P.; Bowman, C. N.; Anseth, K. S. *Biomaterials* 2009, 30 (35), 6702–6707.
